# Supplementary material for: Serum Bioavailable, Rather Than Total, 25‐hydroxyvitamin D Levels Are Associated With Hepatocellular Carcinoma Survival
Source: PubMed Central journal article supplement — Hepatology. 2020 Apr 3;72(1):169–82. doi: 10.1002/hep.31013 (PMC7496975; doi:10.1002/hep.31013), 2020-04-03
Supplement: HEP-72-169-s001.pdf [file HEP-72-169-s001.pdf]

## **SUPPLEMENTARY DATA**

**Serum bioavailable, rather than total, 25-hydroxyvitamin D levels are associated with hepatocellular carcinoma survival**

Ai-Ping Fang, Jing-An Long, Yao-Jun Zhang, Zhao-Yan Liu, Qi-Jiong Li, Dao-Ming Zhang, Yun Luo, Rong-Huan Zhong, Zhong-Guo Zhou, Yan-Jun Xu, Xiao-Jun Xu, Wen-Hua Ling, Min-Shan Chen, Hui-Lian Zhu

### **List of Supplementary Materials**

Supplementary Fig. 1. The flowchart of participant selection for the present analysis in the Guangdong Liver Cancer Cohort study.

Supplementary Fig. 2. Correlations between serum 25-hydroxyvitamin D (25OHD) fractions.

Supplementary Table 1. Baseline characteristics of participants by quartiles of serum bioavailable 25-hydroxyvitamin D (25OHD) levels in the Guangdong Liver Cancer Cohort study.

## SUPPLEMENTARY FIGURES

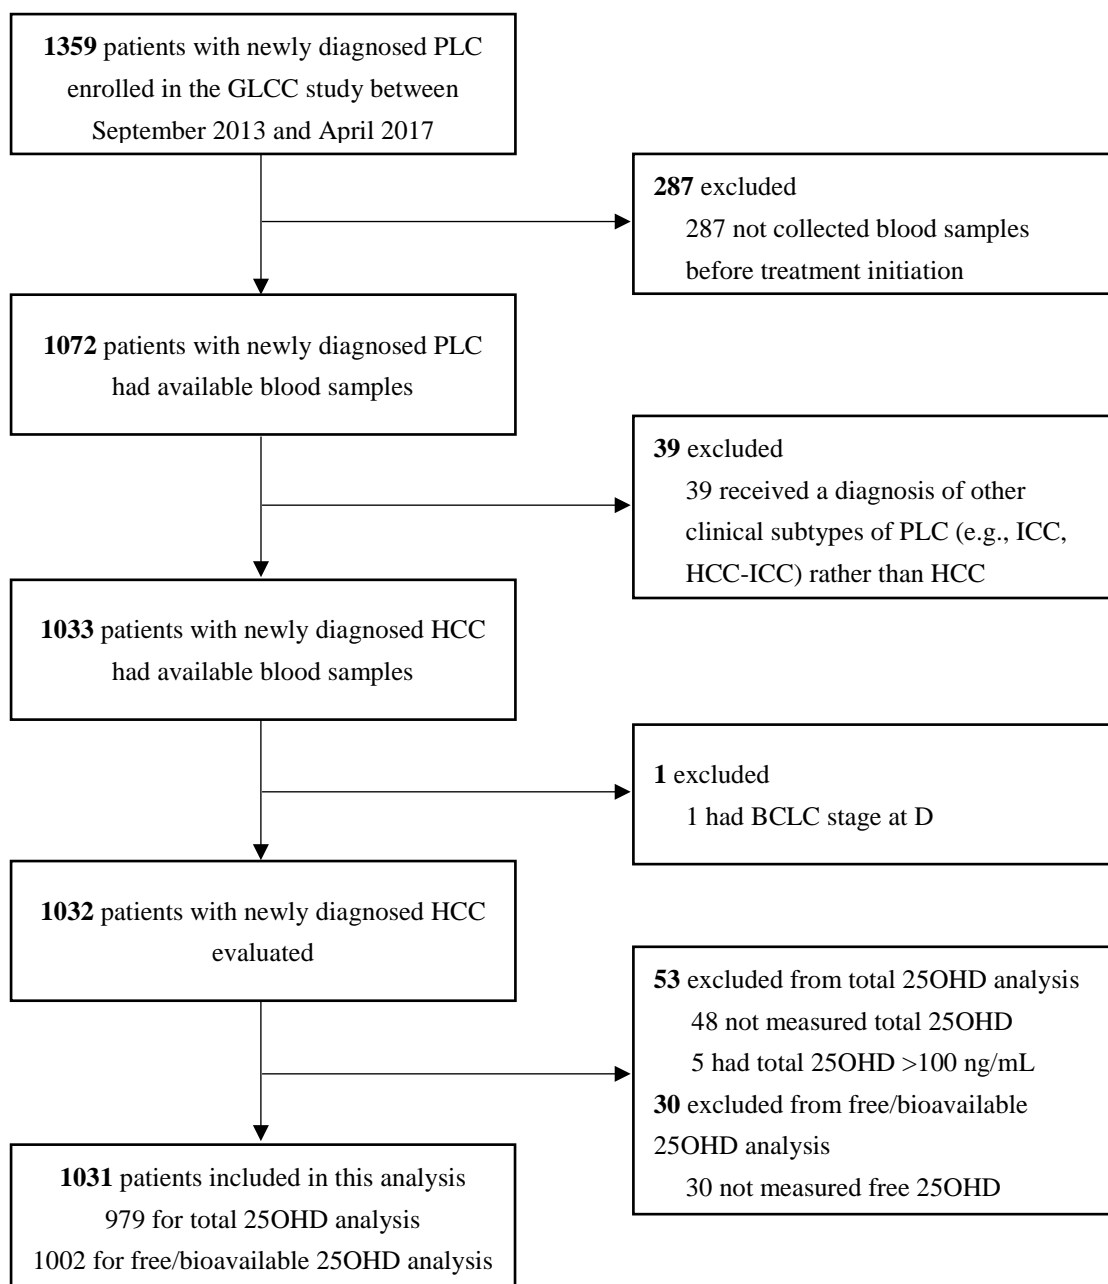

**Supplementary Figure 1. The flowchart of participant selection for the present analysis in the Guangdong Liver Cancer Cohort study.**

Abbreviations: GLCC, Guangdong Liver Cancer Cohort; PLC, primary liver cancer; HCC, hepatocellular carcinoma; ICC, intrahepatic cholangiocarcinoma; BCLC, Barcelona Clinic Liver Cancer.

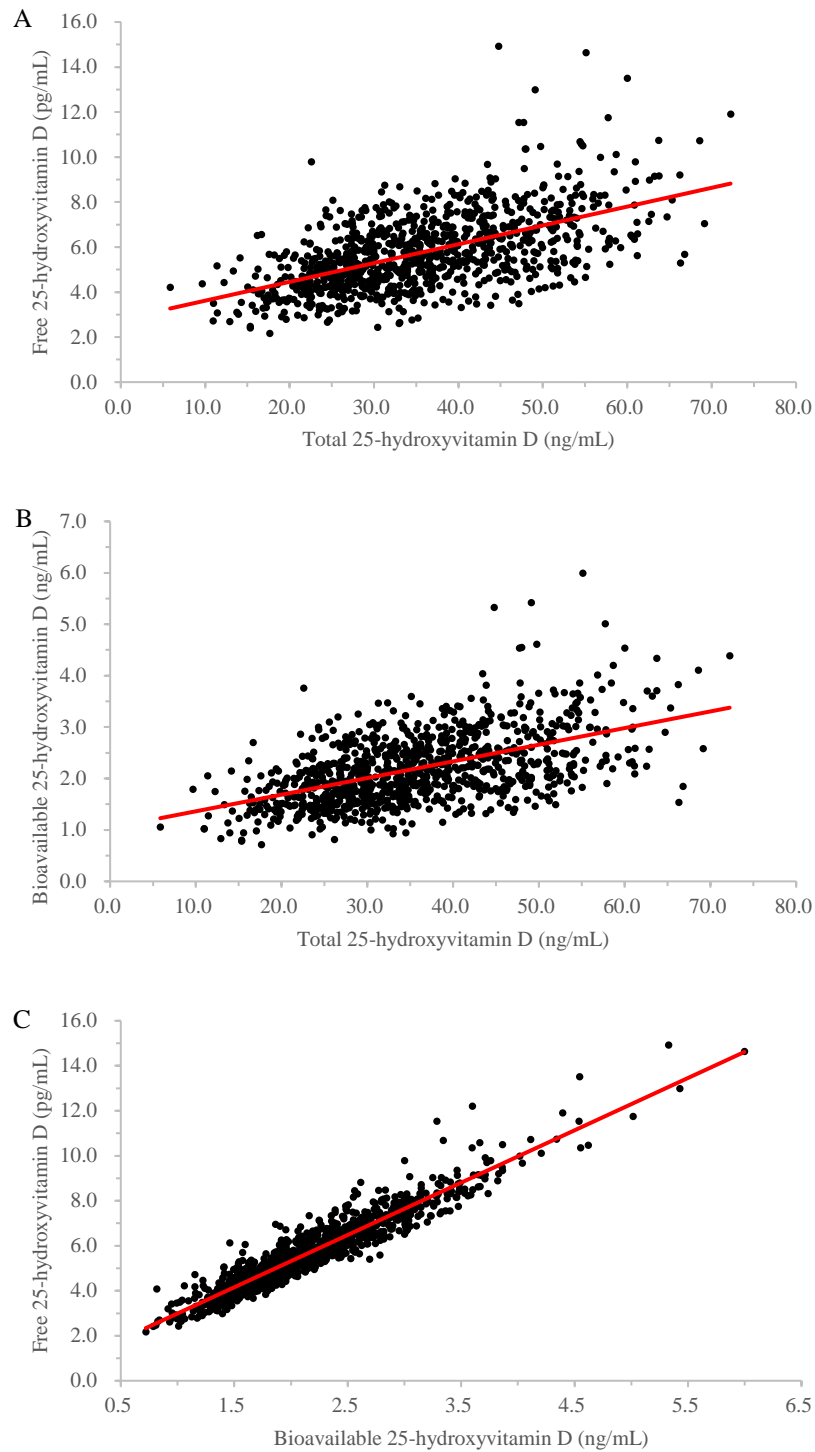

**Supplementary Figure 2. Correlations between serum 25-hydroxyvitamin D (25OHD) fractions.** A. Correlation between free 25OHD and total 25OHD. B. Correlation between bioavailable 25OHD and total 25OHD. C. Correlation between free 25OHD and bioavailable 25OHD.

**SUPPLEMENTARY TABLES**

**Supplementary Table 1. Baseline characteristics of participants by quartiles of serum bioavailable 25-hydroxyvitamin D (25OHD) levels in the Guangdong Liver Cancer Cohort study**

|                                               | Quartile of bioavailable 25OHD |                   |                   |                   | <i>P</i> value |
|-----------------------------------------------|--------------------------------|-------------------|-------------------|-------------------|----------------|
|                                               | Q1 (n=250)                     | Q2 (n=251)        | Q3 (n=251)        | Q4 (n=250)        |                |
| Age at diagnosis (years)                      | 53.8±12.6                      | 53.6±12.5         | 52.8±11.2         | 52.0±11.6         | 0.330          |
| Sex, No. (%)                                  |                                |                   |                   |                   | 0.088          |
| Women                                         | 36 (14.4)                      | 33 (13.1)         | 33 (13.1)         | 19 (7.6)          |                |
| Men                                           | 214 (85.6)                     | 218 (86.9)        | 218 (86.9)        | 231 (92.4)        |                |
| BMI at diagnosis (kg/m <sup>2</sup> )         | 22.7±3.1                       | 22.8±3.4          | 22.6±3.0          | 23.0±3.3          | 0.580          |
| Education level, No. (%)                      |                                |                   |                   |                   | 0.969          |
| Primary school or below                       | 49 (19.8)                      | 50 (19.9)         | 53 (21.2)         | 53 (21.3)         |                |
| Secondary school                              | 146 (58.9)                     | 151 (60.2)        | 146 (58.4)        | 152 (61.0)        |                |
| Collage or higher                             | 53 (21.4)                      | 50 (19.9)         | 51 (20.4)         | 44 (17.7)         |                |
| Residence, No. (%)                            |                                |                   |                   |                   | 0.226          |
| Urban                                         | 184 (73.6)                     | 177 (70.5)        | 181 (72.1)        | 164 (65.6)        |                |
| Rural                                         | 66 (26.4)                      | 74 (29.5)         | 70 (27.9)         | 86 (34.4)         |                |
| Physical activity (MET·hour/day) <sup>a</sup> | 19.3 (15.8, 26.2)              | 20.5 (16.3, 28.3) | 20.9 (16.3, 28.4) | 21.7 (17.5, 30.2) | 0.015          |
| Smoking status, No. (%)                       |                                |                   |                   |                   | 0.244          |
| Never smoker                                  | 95 (38.0)                      | 110 (43.8)        | 113 (45.0)        | 109 (43.6)        |                |
| Former smoker                                 | 76 (30.4)                      | 75 (29.9)         | 63 (25.1)         | 57 (22.8)         |                |
| Current smoker                                | 79 (31.6)                      | 66 (26.3)         | 75 (29.9)         | 84 (33.6)         |                |
| Alcohol drinking status, No. (%)              |                                |                   |                   |                   | 0.830          |
| Never drinker                                 | 147 (58.8)                     | 151 (60.2)        | 138 (55.0)        | 149 (59.6)        |                |
| Former drinker                                | 44 (17.6)                      | 36 (14.3)         | 42 (16.7)         | 38 (15.2)         |                |

|                                | Quartile of bioavailable 25OHD |                    |                    |                    | <i>P</i> value |
|--------------------------------|--------------------------------|--------------------|--------------------|--------------------|----------------|
|                                | Q1 (n=250)                     | Q2 (n=251)         | Q3 (n=251)         | Q4 (n=250)         |                |
| Current drinker                | 59 (23.6)                      | 64 (25.5)          | 71 (28.3)          | 63 (25.2)          |                |
| Family history of PLC, No. (%) |                                |                    |                    |                    | 0.919          |
| No                             | 214 (85.6)                     | 216 (86.1)         | 218 (86.9)         | 219 (87.6)         |                |
| Yes                            | 36 (14.4)                      | 35 (13.9)          | 33 (13.1)          | 31 (12.4)          |                |
| HBV/HCV infection, No. (%)     |                                |                    |                    |                    | 0.320          |
| HBsAg (-) and anti-HCV (-)     | 22 (8.8)                       | 29 (11.6)          | 17 (6.8)           | 23 (9.2)           |                |
| HBsAg (+) and/or anti-HCV (+)  | 228 (91.2)                     | 222 (88.4)         | 234 (93.2)         | 227 (90.8)         |                |
| Fatty liver disease, No. (%)   |                                |                    |                    |                    | 0.127          |
| No                             | 217 (86.8)                     | 202 (80.5)         | 202 (80.5)         | 213 (85.2)         |                |
| Yes                            | 33 (13.2)                      | 49 (19.5)          | 49 (19.5)          | 37 (14.8)          |                |
| Liver cirrhosis, No. (%)       |                                |                    |                    |                    | 0.291          |
| No                             | 83 (33.2)                      | 83 (33.1)          | 96 (38.2)          | 99 (39.6)          |                |
| Yes                            | 167 (66.8)                     | 168 (66.9)         | 155 (61.8)         | 151 (60.4)         |                |
| Serum ALT (U/L)                | 39.2 (27.1, 57.9)              | 36.6 (25.0, 60.0)  | 38.1 (26.0, 57.3)  | 41.6 (28.4, 59.9)  | 0.284          |
| Serum AST (U/L)                | 45.4 (28.8, 73.3)              | 39.2 (27.7, 67.0)  | 38.6 (28.2, 58.8)  | 39.0 (27.3, 60.5)  | 0.056          |
| Serum GGT (U/L)                | 90.2 (46.1, 178.4)             | 71.6 (41.3, 154.9) | 74.2 (39.3, 140.1) | 64.6 (36.0, 134.6) | 0.016          |
| Serum ALP (U/L)                | 107.4 (80.1, 157.0)            | 98.1 (77.9, 125.6) | 95.9 (74.9, 126.1) | 95.1 (77.6, 124.1) | 0.009          |
| Serum bilirubin (mmol/L)       | 14.1 (10.9, 19.6)              | 13.9 (10.7, 19.3)  | 13.5 (10.1, 17.8)  | 14.0 (10.5, 18.0)  | 0.197          |
| Serum albumin (g/L)            | 39.7±4.8                       | 41.8±3.8           | 42.4±3.5           | 43.9±3.6           | <0.001         |
| Child-Pugh score, No. (%)      |                                |                    |                    |                    | <0.001         |
| A                              | 236 (94.4)                     | 249 (99.2)         | 251 (100.0)        | 248 (99.2)         |                |
| B                              | 14 (5.6)                       | 2 (0.8)            | 0 (0.0)            | 2 (0.8)            |                |
| eGFR, No. (%)                  |                                |                    |                    |                    | 0.660          |

|                                     | Quartile of bioavailable 25OHD |            |            |            | <i>P</i> value |
|-------------------------------------|--------------------------------|------------|------------|------------|----------------|
|                                     | Q1 (n=250)                     | Q2 (n=251) | Q3 (n=251) | Q4 (n=250) |                |
| ≥60 mL/min per 1.73 m <sup>2</sup>  | 241 (96.4)                     | 243 (96.8) | 242 (96.4) | 237 (94.8) |                |
| <60 mL/min per 1.73 m <sup>2</sup>  | 9 (3.6)                        | 8 (3.2)    | 9 (3.6)    | 13 (5.2)   |                |
| Serum CRP, No. (%)                  |                                |            |            |            | <0.001         |
| ≤3.0 mg/L                           | 116 (46.4)                     | 124 (49.4) | 127 (50.6) | 163 (65.5) |                |
| >3.0 mg/L                           | 134 (53.6)                     | 127 (50.6) | 124 (49.4) | 86 (34.5)  |                |
| Serum AFP, No. (%)                  |                                |            |            |            | 0.270          |
| ≤400 ng/mL                          | 152 (60.8)                     | 153 (61.0) | 141 (56.2) | 162 (64.8) |                |
| >400 ng/mL                          | 98 (39.2)                      | 98 (39.0)  | 110 (43.8) | 88 (35.2)  |                |
| BCLC stage, No. (%)                 |                                |            |            |            | 0.070          |
| 0                                   | 21 (8.4)                       | 29 (11.6)  | 23 (9.2)   | 37 (14.8)  |                |
| A                                   | 94 (37.6)                      | 66 (26.3)  | 83 (33.1)  | 74 (29.6)  |                |
| B                                   | 24 (9.6)                       | 39 (15.5)  | 27 (10.8)  | 30 (12.0)  |                |
| C                                   | 111 (44.4)                     | 117 (46.6) | 118 (47.0) | 109 (43.6) |                |
| Cancer treatment, No. (%)           |                                |            |            |            | 0.004          |
| Hepatectomy/liver transplantation   | 86 (34.4)                      | 112 (44.6) | 124 (49.4) | 130 (52.0) |                |
| Local ablation                      | 34 (13.6)                      | 28 (11.2)  | 21 (8.4)   | 30 (12.0)  |                |
| Hepatic arterial intervention       | 114 (45.6)                     | 105 (41.8) | 94 (37.5)  | 81 (32.4)  |                |
| Other treatments <sup>b</sup>       | 16 (6.4)                       | 6 (2.4)    | 12 (4.8)   | 9 (3.6)    |                |
| Season of blood collection, No. (%) |                                |            |            |            | 0.004          |
| Spring (Feb-Mar)                    | 50 (20.0)                      | 48 (19.1)  | 50 (19.9)  | 21 (8.4)   |                |
| Summer (Apr-Sep)                    | 120 (48.0)                     | 109 (43.4) | 104 (41.4) | 133 (53.2) |                |
| Autumn (Oct-Nov)                    | 48 (19.2)                      | 54 (21.5)  | 59 (23.5)  | 47 (18.8)  |                |
| Winter (Dec-Jan)                    | 32 (12.8)                      | 40 (15.9)  | 38 (15.1)  | 49 (19.6)  |                |

|                            | Quartile of bioavailable 25OHD |             |            |             | <i>P</i> value |
|----------------------------|--------------------------------|-------------|------------|-------------|----------------|
|                            | Q1 (n=250)                     | Q2 (n=251)  | Q3 (n=251) | Q4 (n=250)  |                |
| Serum calcium (mmol/L)     | 2.25±0.13                      | 2.28±0.11   | 2.28±0.12  | 2.32±0.12   | <0.001         |
| Total 25OHD (ng/mL)        | 28.45±9.00                     | 34.73±14.72 | 37.88±9.73 | 43.90±13.28 | <0.001         |
| Free 25OHD (pg/mL)         | 4.01±0.70                      | 5.10±0.58   | 6.12±0.63  | 7.86±1.42   | <0.001         |
| Bioavailable 25OHD (ng/mL) | 1.43±0.22                      | 1.92±0.11   | 2.33±0.13  | 3.10±0.51   | <0.001         |

Abbreviations: 25OHD, 25-hydroxyvitamin D; BMI, body mass index; PLC, primary liver cancer; HBV, hepatitis B virus; HCV, hepatitis C virus; HBsAg, hepatitis B surface antigen; anti-HCV, hepatitis C antibody; ALT, alanine aminotransferase; AST, aspartate aminotransferase; GGT, gamma-glutamyltransferase; ALP, alkaline phosphatase; eGFR, estimated glomerular filtration rate; CRP, C-reactive protein; AFP, alpha-fetoprotein; BCLC, Barcelona Clinic Liver Cancer.

<sup>a</sup> Including occupation, transportation, housework, and leisure-time physical activity.

<sup>b</sup> Including radiation therapy and systemic treatment (e.g., molecular targeted therapy, systemic chemotherapy, traditional Chinese medication).
